# Supplementary material for: Compositions and conformations of several transition metal complexes with a nonapeptide hormone oxytocin †
Source: Royal Society of Chemistry journal article supplement (doi:10.1039/b004254o), 2000-01-01
Supplement: b004254o.doc [file b004254o.doc]

**Table 2** Hydrogen bonds within oxytocin and its palladium(ii) complex

|  | Hydrogen bond | *d(O-N)*/Å | *θ(N-H-O)*/0 |
| --- | --- | --- | --- |
| **1** | CO(6)-HN(9)a | 3.37 | 172.1 |
| **2** | CO(2)-HN(5) a | 3.44 | 147.8 |
|  | CO(6)-HN(8)a | 3.22 | 134.5 |
| **6** | CO(2)-H2N(5)b | 3.37 | 134.4 |
|  | CO(2)-HN(5)a | 3.34 | 130.0 |
|  | CO(6)-H2N(9)b | 3.47 | 147.9 |

a Peptide HN. b Amide HN.
